# Supplementary figures and images for: Amplification and Demultiplexing in Insulin-regulated Akt Protein Kinase Pathway in Adipocytes
Source: PubMed Central journal article supplement — J Biol Chem. 2011 Dec 29;287(9):6128–38. doi: 10.1074/jbc.M111.318238 (PMC3307283; doi:10.1074/jbc.m111.318238), 2011-12-29

Figure S1.

**A**

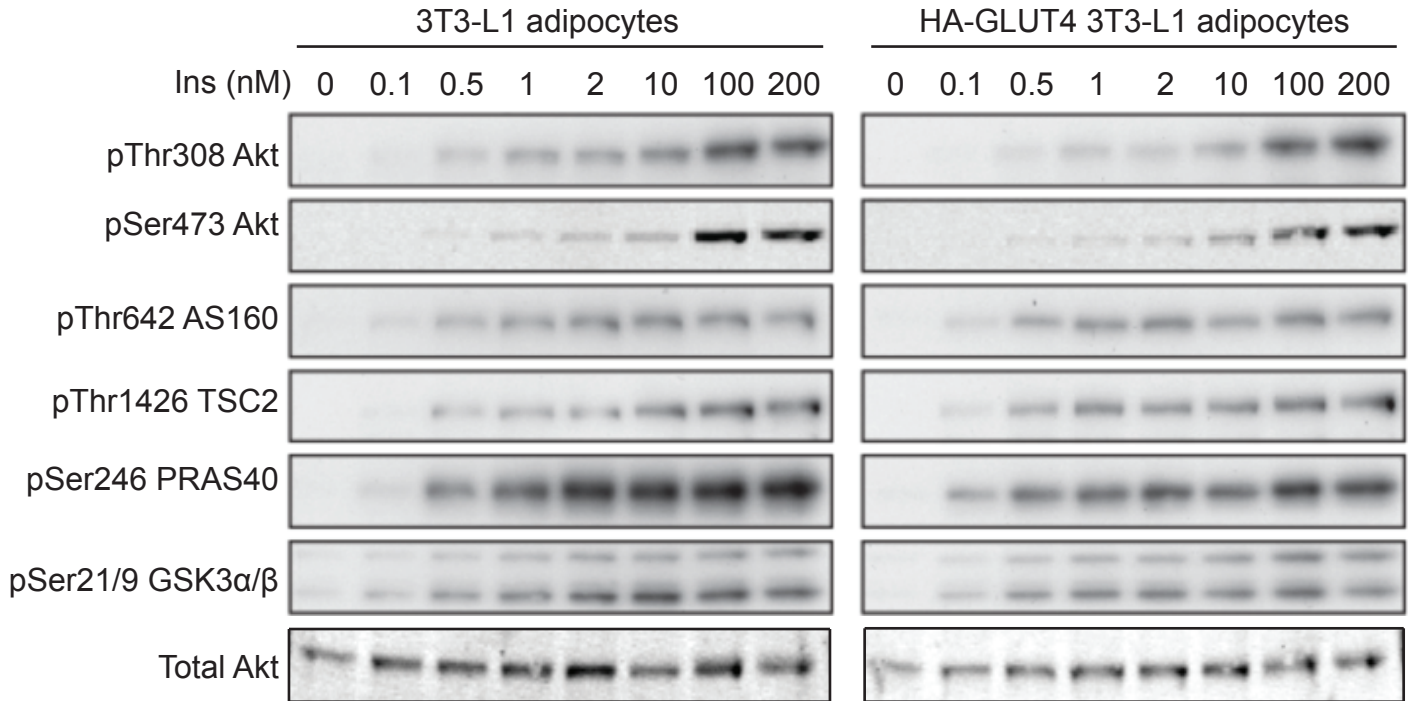

**B**

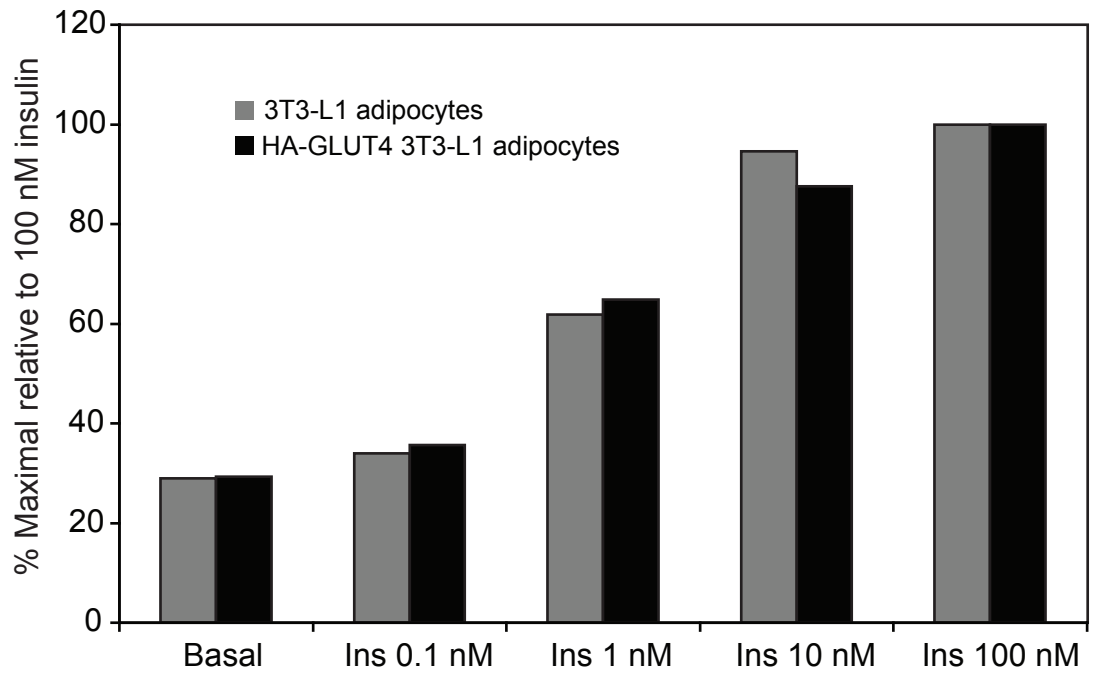

Figure S2

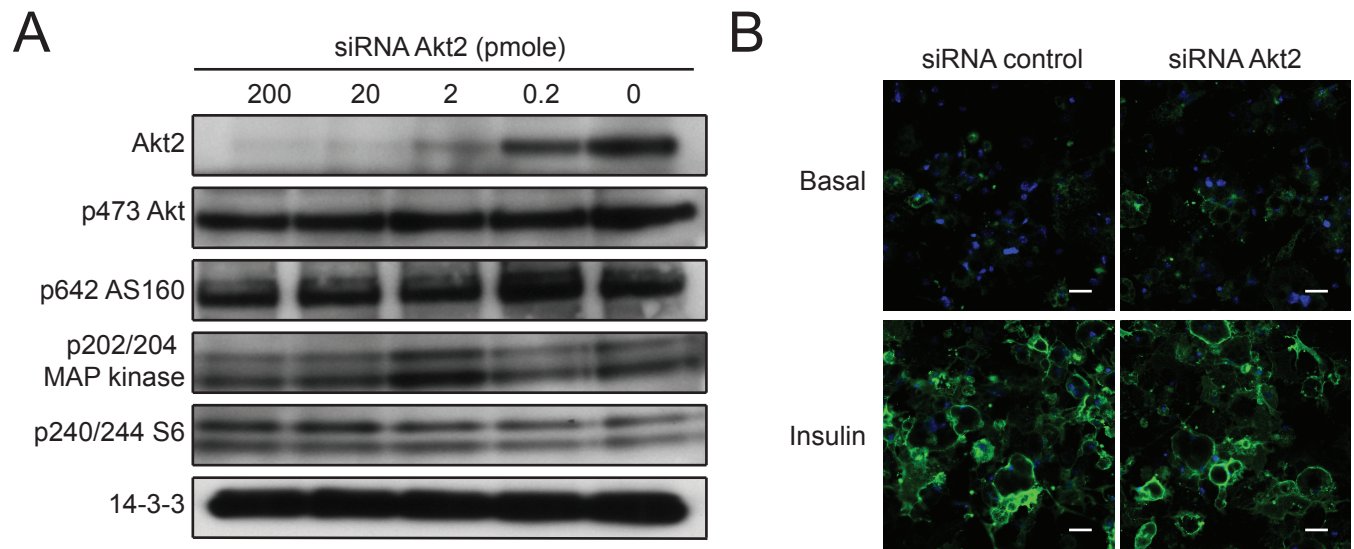

Figure S3

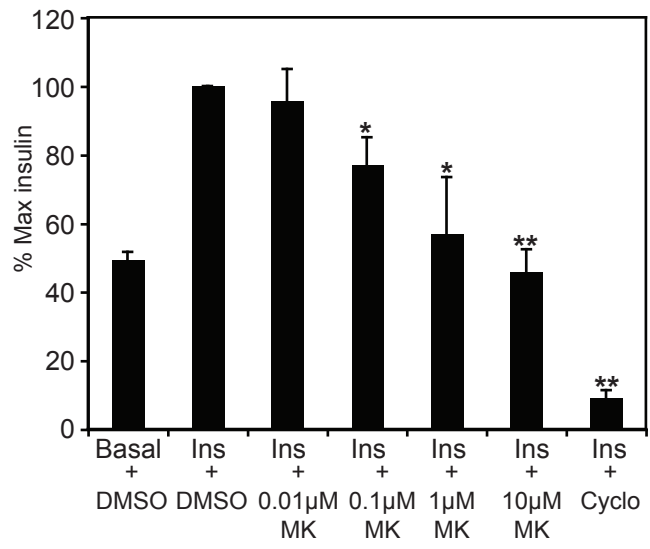

Supplement: supp_M111.318238_jbc.M111.318238-1.pdf [file supp_M111.318238_jbc.M111.318238-1.pdf]
